# Supplementary material for: Association between PD-L1 expression and driver gene status in non-small-cell lung cancer: a meta-analysis
Source: PubMed Central journal article supplement (PMC5800936; doi:10.18632/oncotarget.23969), 2018-01-05
Supplement: oncotarget-09-7684-s001.pdf [file oncotarget-09-7684-s001.pdf]

## Association between PD-L1 expression and driver gene status in non-small-cell lung cancer: a meta-analysis

### SUPPLEMENTARY MATERIALS

Supplementary Table 1: Results of STROBE quality assessment for cross-sectional studies

| Study      | Title and abstract | Introduction | Methods | Results | Discussion | Other information | Total score (%) |
|------------|--------------------|--------------|---------|---------|------------|-------------------|-----------------|
| Zhang      | 1                  | 2            | 8       | 4       | 3          | 0                 | 55              |
| Yang       | 1                  | 2            | 8       | 4       | 3          | 0                 | 55              |
| Incecoo    | 1                  | 2            | 8       | 4       | 4          | 2                 | 64              |
| Cooper     | 1                  | 2            | 7       | 5       | 4          | 2                 | 64              |
| Schmidt    | 1                  | 2            | 10      | 5       | 4          | 2                 | 73              |
| Kim        | 1                  | 2            | 8       | 3       | 2          | 1                 | 52              |
| Yang2      | 1                  | 2            | 9       | 4       | 3          | 2                 | 64              |
| Koh        | 1                  | 2            | 7       | 7       | 4          | 1                 | 67              |
| Tang       | 1                  | 2            | 10      | 4       | 2          | 0                 | 58              |
| Chang      | 1                  | 2            | 7       | 4       | 2          | 2                 | 55              |
| Andreas    | 1                  | 2            | 10      | 5       | 3          | 2                 | 70              |
| Ameratunga | 1                  | 2            | 8       | 6       | 3          | 2                 | 67              |
| Song       | 1                  | 2            | 8       | 5       | 3          | 1                 | 61              |
| Inamura    | 1                  | 2            | 8       | 5       | 4          | 2                 | 67              |
| Jia        | 1                  | 2            | 9       | 5       | 4          | 2                 | 70              |
| Inoue      | 1                  | 2            | 9       | 7       | 3          | 2                 | 73              |
| Ji         | 1                  | 2            | 10      | 4       | 2          | 1                 | 61              |
| Huynh      | 1                  | 2            | 11      | 6       | 4          | 1                 | 76              |
| Mori       | 1                  | 2            | 8       | 5       | 4          | 1                 | 64              |
| Takada     | 1                  | 2            | 9       | 5       | 2          | 1                 | 61              |
| Rangachari | 1                  | 2            | 6       | 5       | 2          | 1                 | 46              |
| Tsao       | 1                  | 2            | 10      | 3       | 3          | 2                 | 76              |
| Dong       | 1                  | 2            | 7       | 7       | 4          | 2                 | 64              |
| Cho        | 1                  | 2            | 9       | 5       | 3          | 1                 | 67              |

**Supplementary Table 2: Data pertaining to status of driver genes and PD-L1 expression in each study**

| Study      | PD-L1(+) Diver gene (mutation/WT)                                                                                   | PD-L1(-) Diver gene (mutation/WT)                                                                                              |
|------------|---------------------------------------------------------------------------------------------------------------------|--------------------------------------------------------------------------------------------------------------------------------|
| Zhang      | EGFR (37/33), ALK (3/67), KRAS (4/66), Her2 (2/68)                                                                  | EGFR (39/34), ALK (6/67), KRAS (3/70), Her2 (5/68)                                                                             |
| Yang       | EGFR (43/22), ALK (2/63), KRAS (5/60), BRAF (4/61), PIK3CA (22/65)                                                  | EGFR (54/44), ALK (1/97), KRAS (3/95), BRAF (3/95), PIK3CA (16/177)                                                            |
| Incecoo    | EGFR (43/22), ALK (2/63), KRAS (5/60), Triple1 (36/7)                                                               | EGFR (16/39), ALK (4/51), KRAS (13/42), Triple (57/22)                                                                         |
| Cooper     | EGFR (0/15), ALK (0/15), KRAS (7/8)                                                                                 | EGFR (33/222), ALK (3/252), KRAS (81/174)                                                                                      |
| Schmidt    | EGFR (2/8)                                                                                                          | EGFR (4/14)                                                                                                                    |
| Kim        | EGFR (0/57), MET (24/65)                                                                                            | EGFR (7/121), MET (65/177)                                                                                                     |
| Koh        | EGFR (128/106), ALK (18/275), KRAS (16/98), MET (117/176)                                                           | EGFR (100/65), ALK (5/195), KRAS (9/76), MET (39/164)                                                                          |
| Tang       | EGFR (64 (L858R 35/ Del19 26)/ 42)                                                                                  | EGFR (25/24)                                                                                                                   |
| Omori      | EGFR (6/19)                                                                                                         | EGFR (23/14)                                                                                                                   |
| Chang      | EGFR (4/46)                                                                                                         | EGFR (4/12)                                                                                                                    |
| Yang2      | EGFR (9/50), ALK (0/59), KRAS (0/59), BRAF (2/57)                                                                   | EGFR (9/37), ALK (0/46), KRAS (1/45), BRAF (6/40)                                                                              |
| Andreas    | KRAS (23/15)                                                                                                        | KRAS (32/53)                                                                                                                   |
| Ameratunga | 5% cutoff: EGFR (7/200), KRAS (43/164); 50% cutoff: EGFR (3/97), KRAS (22/78);                                      | 5% cutoff: EGFR (20/300), KRAS (57/363); 50% cutoff: EGFR (24/403), KRAS (78/349);                                             |
| Song       | EGFR (112/74), ALK (10/176), KRAS (5/181), Her2 (6/180), PIK3CA (2/ 184), BRAF (2/184), Triple (161/25)             | EGFR (93/106), ALK (8/191), KRAS (11/188), Her2 (3/196), PIK3CA (4/ 195), BRAF (0/199), Triple (131/68)                        |
| Inamura    | EGFR (4/24), ALK (1/42), KRAS (4/20)                                                                                | EGFR (89/77), ALK (9/216), KRAS (17/148)                                                                                       |
| Jia        | EGFR (7/9), ALK (1/15), KRAS (1/15)                                                                                 | EGFR (48/44), ALK (4/90), KRAS (8/86)                                                                                          |
| Inoue      | EGFR (25/176), ALK (5/196)                                                                                          | EGFR (107/346), ALK (5/448)                                                                                                    |
| Ji         | EGFR (18/22), KRAS (5/35)                                                                                           | EGFR (42/18), KRAS (5/55)                                                                                                      |
| Huynh      | EGFR (5/90), ALK (1/94), KRAS (50/45), Triple (56/39)                                                               | EGFR (49/117), ALK (3/163), KRAS (58/108), Triple (110/56)                                                                     |
| Mori       | EGFR (5/90)                                                                                                         | EGFR (5/90)                                                                                                                    |
| Takada     | 1% cutoff: EGFR (20/44); 5% cutoff: EGFR (8/32);                                                                    | 1% cutoff: EGFR (92/79); 5% cutoff: EGFR (104/ 91);                                                                            |
| Dong       | 5% cutoff: EGFR (0/7), KRAS (2/5); 50% cutoff: EGFR (0/4), KRAS (1/3);                                              | 5% cutoff: EGFR (1/5), KRAS (0/6); 50% cutoff: EGFR (1/8), KRAS (1/8);                                                         |
| Rangachari | EGFR (0/21), ALK (1/20), KRAS (7/14), Triple (8/13)                                                                 | EGFR (13/37), ALK (3/47), KRAS (16/34), Triple (32/18)                                                                         |
| Tsao       | 1% cutoff: EGFR (5/79), KRAS (44/63); 25% cutoff: EGFR (2/47), KRAS (27/41); 50% cutoff: EGFR (1/32), KRAS (16/26); | 1% cutoff: EGFR (30/186), KRAS (83/195); 25% cutoff: EGFR (33/218), KRAS (100/217); 50% cutoff: EGFR (34/233), KRAS (111/232); |
| Chen       | EGFR (16/8)                                                                                                         | EGFR (12/16)                                                                                                                   |
| Cho        | EGFR (64 (L858R 23/ Del19 38))                                                                                      | EGFR (205 (L858R 98/ Del19 107))                                                                                               |

Note: 1: Mutation of triple represents “at least 1 gene mutation of EGFR, ALK, KRAS”; Wild type of triple represents “triple wild type of EGFR, ALK and KRAS”.

### Supplementary Table 3: Strengthening the Reporting of Observational studies in Epidemiology – Molecular Epidemiology (STROBE-ME)

|                                                                      | Item No | Recommendation                                                                                                                                                                                                                                                                                                                                                                                                  |
|----------------------------------------------------------------------|---------|-----------------------------------------------------------------------------------------------------------------------------------------------------------------------------------------------------------------------------------------------------------------------------------------------------------------------------------------------------------------------------------------------------------------|
| <b>Title and abstract</b>                                            | 1       | State the use of specific biomarker(s) in the title and/or in the abstract if they contribute substantially to the findings.                                                                                                                                                                                                                                                                                    |
| <b>Introduction</b>                                                  |         |                                                                                                                                                                                                                                                                                                                                                                                                                 |
| Background/rationale                                                 | 2       | Explain in the scientific background of the paper how/ why the specific biomarker(s) have been chosen, potentially among many others (e.g. others are studied but reported elsewhere or not studied at all).                                                                                                                                                                                                    |
| Objectives                                                           | 3       | A priori hypothesis: if one or more biomarkers are used as proxy measures, state the a priori hypothesis on the expected values of the biomarker(s).                                                                                                                                                                                                                                                            |
| <b>Methods</b>                                                       |         |                                                                                                                                                                                                                                                                                                                                                                                                                 |
| Study design                                                         | 4       | Describe the special study designs for molecular epidemiology (in particular, nested case/control and case/cohort) and how they were implemented.                                                                                                                                                                                                                                                               |
| Biological sample collection                                         | 4.1     | Report on the setting of the biological sample collection; amount of sample; nature of collecting procedures; participant conditions; time between sample collection and relevant clinical or physiological endpoints.                                                                                                                                                                                          |
| Biological sample storage                                            | 4.2     | Describe sample processing (centrifugation, timing, additives, etc.).                                                                                                                                                                                                                                                                                                                                           |
| Biological sample processing                                         | 4.3     | Describe sample storage until biomarker analysis (storage, thawing, manipulation, etc.).                                                                                                                                                                                                                                                                                                                        |
| Biomarker biochemical characteristics                                | 4.4     | Report the half-life of the biomarker and chemical and physical characteristics (e.g. solubility).                                                                                                                                                                                                                                                                                                              |
| Setting                                                              | 5       | Describe the setting, locations and relevant dates, including periods of recruitment, exposure, follow-up and data collection.                                                                                                                                                                                                                                                                                  |
| Participants                                                         | 6       | Report any habit, clinical condition, physiological factor or working or living condition that might affect the characteristics or concentrations of the biomarker.                                                                                                                                                                                                                                             |
| Variables                                                            | 7       | Clearly define all outcomes, exposures, predictors, potential confounders and effect modifiers. Give diagnostic criteria, if applicable                                                                                                                                                                                                                                                                         |
| Data source/ measurement                                             | 8       | Laboratory methods: report type of assay used, detection limit, quantity of biological sample used, outliers, timing in the assay procedures (when applicable) and calibration procedures or any standard used.                                                                                                                                                                                                 |
| Bias                                                                 | 9       | Describe any efforts to address potential sources of bias                                                                                                                                                                                                                                                                                                                                                       |
| Study size                                                           | 10      | Explain how the study size was arrived at                                                                                                                                                                                                                                                                                                                                                                       |
| Quantitative variables                                               | 11      | Explain how quantitative variables were handled in the analyses. If applicable, describe which groupings were chosen and why                                                                                                                                                                                                                                                                                    |
| Statistical methods                                                  | 12      | Describe how biomarkers were introduced into statistical models.                                                                                                                                                                                                                                                                                                                                                |
| Validity/reliability of measurement and internal/external validation | 12.1    | Report on the validity and reliability of measurement of the biomarker(s) coming from the literature and any internal or external validation used in the study.                                                                                                                                                                                                                                                 |
| <b>Results</b>                                                       |         |                                                                                                                                                                                                                                                                                                                                                                                                                 |
| Participants                                                         | 13      | Give reason for loss of biological samples at each stage.                                                                                                                                                                                                                                                                                                                                                       |
| Descriptive data                                                     | 14      | (a) Give characteristics of study participants (e.g. demographic, clinical and social) and information on exposures and potential confounders.<br>(b) Indicate the number of participants with missing data for each variable of interest.<br>(c) Cohort study – Summarize follow-up time (e.g. average and total amount).                                                                                      |
| Distribution of biomarker measurement.                               | 14.1    | Give the distribution of the biomarker measurement (including mean, median, range and variance).                                                                                                                                                                                                                                                                                                                |
| Outcome data                                                         | 15      | Cohort study – Report numbers of outcome events or summary measures over time. Case-control study – Report numbers in each exposure category or summary measures of exposure. Cross-sectional study – Report numbers of outcome events or summary measures.                                                                                                                                                     |
| Main results                                                         | 16      | (a) Give unadjusted estimates, and, if applicable, confounder-adjusted estimates and their precision (eg, 95% confidence interval). Make clear which confounders were adjusted for and why they were included.<br>(b) Report category boundaries when continuous variables were categorized<br>(c) If relevant, consider translating estimates of relative risk into absolute risk for a meaningful time period |
| Other analyses                                                       | 17      | Report other analyses done, e.g., analyses of subgroups and interactions, and sensitivity analyses                                                                                                                                                                                                                                                                                                              |
| <b>Discussion</b>                                                    |         |                                                                                                                                                                                                                                                                                                                                                                                                                 |
| Key results                                                          | 18      | Summarize key results with reference to study objectives                                                                                                                                                                                                                                                                                                                                                        |
| Limitations                                                          | 19      | Describe main limitations in laboratory procedures.                                                                                                                                                                                                                                                                                                                                                             |
| Interpretation                                                       | 20      | Give an interpretation of results in terms of a priori biological plausibility.                                                                                                                                                                                                                                                                                                                                 |
| Generalizability                                                     | 21      | Discuss the generalizability (external validity) of the study results.                                                                                                                                                                                                                                                                                                                                          |
| <b>Other information</b>                                             |         |                                                                                                                                                                                                                                                                                                                                                                                                                 |
| Funding                                                              | 22      | Give the source of funding and the role of the funders for the present study and, if applicable, for the original study on which the present article is based.                                                                                                                                                                                                                                                  |
| Ethics                                                               | 22.1    | Describe informed consent and approval from ethical committee(s). Specify whether samples were anonymous, anonymized or identifiable.                                                                                                                                                                                                                                                                           |
